# Supplementary material
Source: publisher figshare collection journal article supplement (https://frontiersin.figshare.com/ndownloader/files/30917560)
Supplement: Supplementary file 1 [file 30917560]

## Sheet: StandardCheck
sample #	Sample ID	Cup Number	NO2 (uM)	% recovery NO2	NH3 (uM)	% recovery NH3	OP4 (uM)	% recovery OP4
1	S6chk	2	5.001	100.02	104.308	104.308	10.243	102.43
15	S6chk	2	4.913	98.26	102.903	102.903	10.124	101.24
29	S6chk	2	4.92	98.4	103.094	103.094	10.062	100.62
46	S6	2	4.955	99.1	102.128	102.128	10.084	100.84
					Slope	-0.000425826
					Intercept	1.04077

## Sheet: Final_Ammonium
Sample ID	Drift corrected NH3 (uM)	STDEV			Average (uM)				Average (uM)	STDEV	SE
D1SE1	105.011			D3SE	7.45608			SE	97.24	114.596	38.1987
D1SE2	11.8387			D3SI	11.7957			SI	76.8903	89.0798	29.6933
D1SE3	20.9144			D1SE	45.9215			UE	160.999	86.4569	28.819
D1SI1	50.6245			D1UI	56.1432			UI	150.42	113.341	37.7802
D1SI2	94.6132			D1SI	82.9642
D1SI3	103.655			D3UE	103.184
D1UE1	58.664			D2SI	135.911				Remineralization
D1UE2	248.823			D1UE	166.794				Organic nitrogen --> Ammonium
D1UE3	192.896			D3UI	174.313				Residence time is also high around Unstable, so a combination of
D1UI1	48.9171			D2UE	213.018				production and "stickiness"
D1UI2	40.0831			D2UI	220.803
D1UI3	79.4295			D2SE	238.343
D2SE1	309.102
D2SE2	188.048
D2SE3	217.877
D2SI1	79.5478
D2SI2	294.116
D2SI3	34.0695
D2UE1	281.14
D2UE2	260.62
D2UE3	97.295
D2UI1	328.797
D2UI2	258.727
D2UI3	74.8856
D3SE1	9.41313
D3SE2	5.00924
D3SE3	7.94588
D3SI1	8.01264
D3SI2	13.4528
D3SI3	13.9216
D3UE1	113.433
D3UE2	66.486
D3UE3	129.634
D3UI1	94.2523
D3UI2	299.99
D3UI3	128.698

## Sheet: Raw_Ammonium
Sample ID	Replicate Number	Cup Number	Analyte Name	Peak Concentration	Concentration Units	Peak Height	Peak Area	Analyte Name	Peak Concentration	Concentration Units	Peak Height	Peak Area	Analyte Name	Peak Concentration	Concentration Units	Peak Height	Peak Area
DI	1	1	NO2	0	uM	0.002	0.002	NH3	0	uM	0.005	0.018	OP4	0	uM	0.0005467	0.0006825			di	1	1	NO2	0.001	uM	0.002	0.003	NH3	0.7946	uM	0.007	0.026	OP4	0.098	uM	0.002	0.009
BLK	1	1	NO2	0	uM	0.002	0.002	NH3	0	uM	0.0007749	0.000651	OP4	0	uM	0.001	0.004			di	1	1	NO2	0.002	uM	0.001	0.003	NH3	0.8059	uM	0.007	0.025	OP4	0.186	uM	0.006	0.028
S1	1	2	NO2	0.25	uM	0.017	0.039	NH3	5	uM	0.096	0.355	OP4	0.5	uM	0.02	0.091			di	1	1	NO2	0.006	uM	0.002	0.003	NH3	0.8782	uM	0.005	0.019	OP4	0.103	uM	0.002	0.01
S2	1	3	NO2	0.5	uM	0.032	0.072	NH3	10	uM	0.226	0.832	OP4	1	uM	0.041	0.184			di	1	1	NO2	0.003	uM	0.002	0.003	NH3	0.8865	uM	0.005	0.018	OP4	0.069	uM	0.0008113	0.002
S3	1	4	NO2	1.25	uM	0.079	0.18	NH3	25	uM	0.549	2.024	OP4	2.5	uM	0.123	0.553			di	1	1	NO2	0.0002511	uM	0.002	0.002	NH3	0.9503	uM	0.004	0.013	OP4	0.102	uM	0.003	0.01
S4	1	5	NO2	2.5	uM	0.156	0.358	NH3	50	uM	1.141	4.214	OP4	5	uM	0.247	1.11			D3SE2	1	37	NO2	0.569	uM	0.036	0.083	NH3	5.149	uM	0.142	0.519	OP4	0.771	uM	0.036	0.159
S5	1	6	NO2	3.75	uM	0.233	0.533	NH3	75	uM	1.736	6.41	OP4	7.5	uM	0.374	1.681			D3SE3	1	38	NO2	0.1027	uM	0.011	0.01222	NH3	8.164	uM	0.209	0.769	OP4	0.151	uM	0.007	0.02
S6	1	2	NO2	5	uM	0.311	0.711	NH3	100	uM	2.385	8.802	OP4	10	uM	0.498	2.239			D3SI1	1	39	NO2	1.102	uM	0.069	0.159	NH3	8.229	uM	0.211	0.775	OP4	1.495	uM	0.072	0.321
S7	1	7	NO2	6.25	uM	0.392	0.897	NH3	125	uM	2.941	10.859	OP4	12.5	uM	0.644	2.896			S2	1	3	NO2	0.497	uM	0.032	0.073	NH3	9.594	uM	0.241	0.888	OP4	0.967	uM	0.045	0.203
S8	1	8	NO2	12.5	uM	0.775	1.781	NH3	250	uM	5.535	20.463	OP4	25	uM	1.293	5.816			D3SE1	1	36	NO2	1.014	uM	0.065	0.147	NH3	9.68	uM	0.244	0.895	OP4	1.064	uM	0.051	0.224
di	1	1	NO2	0.002	uM	0.002	0.003	NH3	0.8209	uM	0.007	0.024	OP4	0.141	uM	0.004	0.018			D1SE2	1	13	NO2	0.081	uM	0.014	0.014	NH3	12.32	uM	0.302	1.115	OP4	0.737	uM	0.034	0.151
srm1	1	9	NO2	0.001	uM	0.002	0.003	NH3	10.164	uM	0.254	0.936	OP4	2.603	uM	0.127	0.569			D3SI2	1	40	NO2	0.3	uM	0.02	0.045	NH3	13.81	uM	0.336	1.238	OP4	0.973	uM	0.046	0.204
srm2	1	10	NO2	0.003	uM	0.002	0.003	NH3	59.089	uM	1.353	4.997	OP4	12.535	uM	0.632	2.846			D3SI3	1	41	NO2	0.07926	uM	0.016	0.008885	NH3	14.285	uM	0.347	1.278	OP4	0.324	uM	0.015	0.059
srm3	1	11	NO2	0.002203	uM	0.002	0.002	NH3	120.933	uM	2.745	10.132	OP4	24.95	uM	1.292	5.828			D1SE3	1	14	NO2	1.29	uM	0.081	0.186	NH3	21.755	uM	0.515	1.898	OP4	4.155	uM	0.205	0.919
S6chk	1	2	NO2	5.001	uM	0.312	0.714	NH3	104.308	uM	2.371	8.752	OP4	10.243	uM	0.513	2.312			D2SI3	1	29	NO2	0.198	uM	0.032	0.031	NH3	35.174	uM	0.817	3.012	OP4	0.593	uM	0.027	0.119
di	1	1	NO2	0.002	uM	0.001	0.003	NH3	0.8059	uM	0.007	0.025	OP4	0.186	uM	0.006	0.028			D1UI2	1	22	NO2	0.679	uM	0.042	0.099	NH3	41.547	uM	0.957	3.541	OP4	5.993	uM	0.298	1.336
JoshH D1SE1	1	12	NO2	0.023	uM	0.012	0.006	NH3	109.329	uM	2.482	9.169	OP4	0.479	uM	0.021	0.094			S4	1	5	NO2	2.476	uM	0.155	0.355	NH3	50.111	uM	1.159	4.252	OP4	5.084	uM	0.251	1.129
D1SE2	1	13	NO2	0.081	uM	0.014	0.014	NH3	12.32	uM	0.302	1.115	OP4	0.737	uM	0.034	0.151			D1UI1	1	21	NO2	1.035	uM	0.066	0.15	NH3	50.726	uM	1.167	4.303	OP4	4.227	uM	0.208	0.935
D1SE3	1	14	NO2	1.29	uM	0.081	0.186	NH3	21.755	uM	0.515	1.898	OP4	4.155	uM	0.205	0.919			D1SI1	1	15	NO2	1.604	uM	0.101	0.231	NH3	52.636	uM	1.208	4.462	OP4	2.637	uM	0.129	0.577
D1SI1	1	15	NO2	1.604	uM	0.101	0.231	NH3	52.636	uM	1.208	4.462	OP4	2.637	uM	0.129	0.577			D1UE1	1	18	NO2	0.706	uM	0.044	0.103	NH3	60.914	uM	1.394	5.149	OP4	3.006	uM	0.148	0.66
D1SI2	1	16	NO2	0.583	uM	0.04	0.085	NH3	98.329	uM	2.236	8.255	OP4	2.226	uM	0.109	0.484			D3UE2	1	43	NO2	0.986	uM	0.063	0.143	NH3	68.162	uM	1.561	5.751	OP4	3.58	uM	0.176	0.789
D1SI3	1	17	NO2	0.96	uM	0.061	0.139	NH3	107.678	uM	2.45	9.031	OP4	6.24	uM	0.31	1.392			D2UI3	1	35	NO2	0.907	uM	0.057	0.131	NH3	77.11	uM	1.762	6.494	OP4	4.335	uM	0.214	0.96
D1UE1	1	18	NO2	0.706	uM	0.044	0.103	NH3	60.914	uM	1.394	5.149	OP4	3.006	uM	0.148	0.66			D2SI1	1	27	NO2	0.06626	uM	0.01	0.007035	NH3	82.199	uM	1.875	6.916	OP4	0.363	uM	0.015	0.068
D1UE2	1	19	NO2	1.341	uM	0.086	0.193	NH3	258.252	uM	5.826	21.533	OP4	5.831	uM	0.289	1.299			D1UI3	1	23	NO2	1.281	uM	0.082	0.185	NH3	82.294	uM	1.875	6.924	OP4	5.308	uM	0.263	1.18
D1UE3	1	20	NO2	0.746	uM	0.046	0.109	NH3	200.117	uM	4.527	16.706	OP4	24.132	uM	1.25	5.626			D3UI1	1	45	NO2	0.552	uM	0.034	0.081	NH3	96.544	uM	2.2	8.107	OP4	4.283	uM	0.211	0.948
D1UI1	1	21	NO2	1.035	uM	0.066	0.15	NH3	50.726	uM	1.167	4.303	OP4	4.227	uM	0.208	0.935			D1SI2	1	16	NO2	0.583	uM	0.04	0.085	NH3	98.329	uM	2.236	8.255	OP4	2.226	uM	0.109	0.484
D1UI2	1	22	NO2	0.679	uM	0.042	0.099	NH3	41.547	uM	0.957	3.541	OP4	5.993	uM	0.298	1.336			D2UE3	1	32	NO2	0.929	uM	0.058	0.135	NH3	100.317	uM	2.285	8.42	OP4	5.787	uM	0.288	1.289
D1UI3	1	23	NO2	1.281	uM	0.082	0.185	NH3	82.294	uM	1.875	6.924	OP4	5.308	uM	0.263	1.18			S6	1	2	NO2	4.955	uM	0.309	0.707	NH3	102.128	uM	2.338	8.571	OP4	10.084	uM	0.505	2.275
S6chk	1	2	NO2	4.913	uM	0.306	0.701	NH3	102.903	uM	2.348	8.635	OP4	10.124	uM	0.507	2.285			S6chk	1	2	NO2	4.913	uM	0.306	0.701	NH3	102.903	uM	2.348	8.635	OP4	10.124	uM	0.507	2.285
di	1	1	NO2	0.0002511	uM	0.002	0.002	NH3	0.9503	uM	0.004	0.013	OP4	0.102	uM	0.003	0.01			S6chk	1	2	NO2	4.92	uM	0.306	0.702	NH3	103.094	uM	2.356	8.651	OP4	10.062	uM	0.504	2.27
D2SE1	1	24	NO2	2.703	uM	0.175	0.387	NH3	319.826	uM	7.206	26.645	OP4	6.752	uM	0.337	1.509			D1SI3	1	17	NO2	0.96	uM	0.061	0.139	NH3	107.678	uM	2.45	9.031	OP4	6.24	uM	0.31	1.392
D2SE2	1	25	NO2	0.997	uM	0.072	0.144	NH3	194.487	uM	4.413	16.239	OP4	3.144	uM	0.157	0.691			D1SE1	1	12	NO2	0.023	uM	0.012	0.006	NH3	109.329	uM	2.482	9.169	OP4	0.479	uM	0.021	0.094
D2SE3	1	26	NO2	1.354	uM	0.086	0.195	NH3	225.238	uM	5.106	18.792	OP4	2.889	uM	0.142	0.633			D3UE1	1	42	NO2	0.973	uM	0.062	0.141	NH3	116.343	uM	2.652	9.751	OP4	6.493	uM	0.323	1.45
D2SI1	1	27	NO2	0.06626	uM	0.01	0.007035	NH3	82.199	uM	1.875	6.916	OP4	0.363	uM	0.015	0.068			D3UI3	1	47	NO2	1.369	uM	0.086	0.197	NH3	131.712	uM	3.003	11.027	OP4	8.899	uM	0.445	2.002
D2SI2	1	28	NO2	0.569	uM	0.041	0.083	NH3	303.785	uM	6.85	25.313	OP4	1.357	uM	0.065	0.29			D3UE3	1	44	NO2	1.018	uM	0.065	0.147	NH3	132.844	uM	3.019	11.121	OP4	6.537	uM	0.325	1.46
D2SI3	1	29	NO2	0.198	uM	0.032	0.031	NH3	35.174	uM	0.817	3.012	OP4	0.593	uM	0.027	0.119			D2SE2	1	25	NO2	0.997	uM	0.072	0.144	NH3	194.487	uM	4.413	16.239	OP4	3.144	uM	0.157	0.691
D2UE1	1	30	NO2	1.182	uM	0.076	0.171	NH3	290.127	uM	6.545	24.179	OP4	25.259	uM	1.313	5.904			D1UE3	1	20	NO2	0.746	uM	0.046	0.109	NH3	200.117	uM	4.527	16.706	OP4	24.132	uM	1.25	5.626
D2UE2	1	31	NO2	0.055	uM	0.013	0.01	NH3	268.833	uM	6.072	22.411	OP4	2.741	uM	0.134	0.6			D2SE3	1	26	NO2	1.354	uM	0.086	0.195	NH3	225.238	uM	5.106	18.792	OP4	2.889	uM	0.142	0.633
D2UE3	1	32	NO2	0.929	uM	0.058	0.135	NH3	100.317	uM	2.285	8.42	OP4	5.787	uM	0.288	1.289			S8	1	8	NO2	12.421	uM	0.771	1.769	NH3	243.92	uM	5.542	20.343	OP4	24.953	uM	1.293	5.828
D2UI1	1	33	NO2	2.285	uM	0.147	0.327	NH3	338.861	uM	7.626	28.225	OP4	13.031	uM	0.658	2.962			D1UE2	1	19	NO2	1.341	uM	0.086	0.193	NH3	258.252	uM	5.826	21.533	OP4	5.831	uM	0.289	1.299
D2UI2	1	34	NO2	1.937	uM	0.125	0.278	NH3	266.529	uM	6.013	22.22	OP4	27.621	uM	1.444	6.491			D2UI2	1	34	NO2	1.937	uM	0.125	0.278	NH3	266.529	uM	6.013	22.22	OP4	27.621	uM	1.444	6.491
D2UI3	1	35	NO2	0.907	uM	0.057	0.131	NH3	77.11	uM	1.762	6.494	OP4	4.335	uM	0.214	0.96			D2UE2	1	31	NO2	0.055	uM	0.013	0.01	NH3	268.833	uM	6.072	22.411	OP4	2.741	uM	0.134	0.6
S6chk	1	2	NO2	4.92	uM	0.306	0.702	NH3	103.094	uM	2.356	8.651	OP4	10.062	uM	0.504	2.27			D2UE1	1	30	NO2	1.182	uM	0.076	0.171	NH3	290.127	uM	6.545	24.179	OP4	25.259	uM	1.313	5.904
di	1	1	NO2	0.006	uM	0.002	0.003	NH3	0.8782	uM	0.005	0.019	OP4	0.103	uM	0.002	0.01			D2SI2	1	28	NO2	0.569	uM	0.041	0.083	NH3	303.785	uM	6.85	25.313	OP4	1.357	uM	0.065	0.29
D3SE1	1	36	NO2	1.014	uM	0.065	0.147	NH3	9.68	uM	0.244	0.895	OP4	1.064	uM	0.051	0.224			D3UI2	1	46	NO2	0.792	uM	0.052	0.115	NH3	307.15	uM	6.929	25.592	OP4	14.295	uM	0.724	3.259
D3SE2	1	37	NO2	0.569	uM	0.036	0.083	NH3	5.149	uM	0.142	0.519	OP4	0.771	uM	0.036	0.159			D2SE1	1	24	NO2	2.703	uM	0.175	0.387	NH3	319.826	uM	7.206	26.645	OP4	6.752	uM	0.337	1.509
D3SE3	1	38	NO2	0.1027	uM	0.011	0.01222	NH3	8.164	uM	0.209	0.769	OP4	0.151	uM	0.007	0.02			D2UI1	1	33	NO2	2.285	uM	0.147	0.327	NH3	338.861	uM	7.626	28.225	OP4	13.031	uM	0.658	2.962
D3SI1	1	39	NO2	1.102	uM	0.069	0.159	NH3	8.229	uM	0.211	0.775	OP4	1.495	uM	0.072	0.321
D3SI2	1	40	NO2	0.3	uM	0.02	0.045	NH3	13.81	uM	0.336	1.238	OP4	0.973	uM	0.046	0.204
D3SI3	1	41	NO2	0.07926	uM	0.016	0.008885	NH3	14.285	uM	0.347	1.278	OP4	0.324	uM	0.015	0.059
D3UE1	1	42	NO2	0.973	uM	0.062	0.141	NH3	116.343	uM	2.652	9.751	OP4	6.493	uM	0.323	1.45
D3UE2	1	43	NO2	0.986	uM	0.063	0.143	NH3	68.162	uM	1.561	5.751	OP4	3.58	uM	0.176	0.789
D3UE3	1	44	NO2	1.018	uM	0.065	0.147	NH3	132.844	uM	3.019	11.121	OP4	6.537	uM	0.325	1.46
D3UI1	1	45	NO2	0.552	uM	0.034	0.081	NH3	96.544	uM	2.2	8.107	OP4	4.283	uM	0.211	0.948
D3UI2	1	46	NO2	0.792	uM	0.052	0.115	NH3	307.15	uM	6.929	25.592	OP4	14.295	uM	0.724	3.259
D3UI3	1	47	NO2	1.369	uM	0.086	0.197	NH3	131.712	uM	3.003	11.027	OP4	8.899	uM	0.445	2.002
di	1	1	NO2	0.003	uM	0.002	0.003	NH3	0.8865	uM	0.005	0.018	OP4	0.069	uM	0.0008113	0.002
S2	1	3	NO2	0.497	uM	0.032	0.073	NH3	9.594	uM	0.241	0.888	OP4	0.967	uM	0.045	0.203
S4	1	5	NO2	2.476	uM	0.155	0.355	NH3	50.111	uM	1.159	4.252	OP4	5.084	uM	0.251	1.129
S6	1	2	NO2	4.955	uM	0.309	0.707	NH3	102.128	uM	2.338	8.571	OP4	10.084	uM	0.505	2.275
S8	1	8	NO2	12.421	uM	0.771	1.769	NH3	243.92	uM	5.542	20.343	OP4	24.953	uM	1.293	5.828
di	1	1	NO2	0.001	uM	0.002	0.003	NH3	0.7946	uM	0.007	0.026	OP4	0.098	uM	0.002	0.009

## Sheet: Ammonium_Drift_Corrected
sample #	Sample ID	Cup Number	NO2 (uM)	% recovery NO2	NH3 (uM)	% recovery NH3	Drift corrected NH3 (uM)	OP4 (uM)	% recovery OP4
	DI	1	0		0			0
	BLK	1	0		0			0
	S1	2	0.25		5			0.5
	S2	3	0.5		10			1
	S3	4	1.25		25			2.5
	S4	5	2.5		50			5
	S5	6	3.75		75			7.5
	S6	2	5		100			10
	S7	7	6.25		125			12.5
	S8	8	12.5		250			25
	di	1	0.002		0.8209			0.141
	srm1	9	0.001		10.164			2.603
	srm2	10	0.003		59.089			12.535
	srm3	11	0.002203		120.933			24.95
1	S6chk	2	5.001	100.02	104.308	104.308	100.1	10.243	102.43
2	di	1	0.002		0.8059		0.77373	0.186
3	D1SE1	12	0.023		109.329		105.011	0.479
4	D1SE2	13	0.081		12.32		11.8387	0.737
5	D1SE3	14	1.29		21.755		20.9144	4.155				(y-104.08)/(-.0426)= x
6	D1SI1	15	1.604		52.636		50.6245	2.637
7	D1SI2	16	0.583		98.329		94.6132	2.226
8	D1SI3	17	0.96		107.678		103.655	6.24
9	D1UE1	18	0.706		60.914		58.664	3.006
10	D1UE2	19	1.341		258.252		248.823	5.831
11	D1UE3	20	0.746		200.117		192.896	24.132
12	D1UI1	21	1.035		50.726		48.9171	4.227
13	D1UI2	22	0.679		41.547		40.0831	5.993
14	D1UI3	23	1.281		82.294		79.4295	5.308
15	S6chk	2	4.913	98.26	102.903	102.903	99.3649	10.124	101.24
16	di	1	0.0002511		0.9503		0.918031	0.102
17	D2SE1	24	2.703		319.826		309.102	6.752
18	D2SE2	25	0.997		194.487		188.048	3.144
19	D2SE3	26	1.354		225.238		217.877	2.889
20	D2SI1	27	0.06626		82.199		79.5478	0.363
21	D2SI2	28	0.569		303.785		294.116	1.357
22	D2SI3	29	0.198		35.174		34.0695	0.593
23	D2UE1	30	1.182		290.127		281.14	25.259
24	D2UE2	31	0.055		268.833		260.62	2.741
25	D2UE3	32	0.929		100.317		97.295	5.787
26	D2UI1	33	2.285		338.861		328.797	13.031
27	D2UI2	34	1.937		266.529		258.727	27.621
28	D2UI3	35	0.907		77.11		74.8856	4.335
29	S6chk	2	4.92	98.4	103.094	103.094	100.164	10.062	100.62
30	di	1	0.006		0.8782		0.853615	0.103
31	D3SE1	36	1.014		9.68		9.41313	1.064
32	D3SE2	37	0.569		5.149		5.00924	0.771
33	D3SE3	38	0.1027		8.164		7.94588	0.151
34	D3SI1	39	1.102		8.229		8.01264	1.495
35	D3SI2	40	0.3		13.81		13.4528	0.973
36	D3SI3	41	0.07926		14.285		13.9216	0.324
37	D3UE1	42	0.973		116.343		113.433	6.493
38	D3UE2	43	0.986		68.162		66.486	3.58
39	D3UE3	44	1.018		132.844		129.634	6.537
40	D3UI1	45	0.552		96.544		94.2523	4.283
41	D3UI2	46	0.792		307.15		299.99	14.295
42	D3UI3	47	1.369		131.712		128.698	8.899
43	di	1	0.003		0.8865		0.86659	0.069
44	S2	3	0.497		9.594		9.38261	0.967
45	S4	5	2.476		50.111		49.0282	5.084
46	S6	2	4.955	99.1	102.128	102.128	99.9647	10.084	100.84
47	S8	8	12.421		243.92		238.857	24.953
48	di	1	0.001		0.7946		0.778445	0.098

## Sheet: Raw_Sulfide
Standard (uM)	Absorbance
0	0.006	slope:	0.0168283		0.004	0.006
5	0.132	intercept:	0.0567592		0.188	0.132
12.5	0.275				0.473	0.275
25	0.542				0.813	0.542
50	0.906				1.547	0.906
100	1.719	1.727			2.529	1.719
Sample	Depth (cm)	Absorbance	Dilution Factor	Concentration (uM)	Conc*DF	Dilution by ZnAc	Sample Concentration (uM)
DI Blank		0.017		-2.36264	0	2.66667	0
DI Blank		0		-3.37285	0	2.66667	0
																					STDEV	STD Error (STDEV/SQRT(n))	mM
D1SE1		0.02	1	-2.18437	-2.18437	2.66667	-5.82499									D1SE1	-5.82499		D1SE1	-5.82499
D1SE2		0.116	50	3.52031	176.015	2.66667	469.375									D1SE2	469.375		D1SE2	469.375
D1SE3		0.625	50	33.767	1688.35	2.25	3798.79	1420.78	1692.66							D1SE3	3798.79		D1SE3	3798.79
D1SI1		0.309	50	14.9891	749.455	2.66667	1998.55									D1SI1	1998.55		D2SE1	3020.63
D1SI2		0.084	50	1.61875	80.9374	2.66667	215.833									D1SI2	215.833		D2SE2	5144.04
D1SI3		0.217	50	9.52211	476.105	2.66667	1269.61	1161.33	731.806							D1SI3	1269.61		D2SE3	4082.34
D1UE1		1.107	50	62.4093	3120.46	2.66667	8321.24									D1UE1	8321.24		D3SE2	6578.14
D1UE2		1.078	50	60.686	3034.3	2.66667	8091.46									D1UE2	8091.46		D3SE3	1745	2044.68	772.817	0.772817
D1UE3		0.522	50	27.6464	1382.32	2.66667	3686.18	6699.63	2132.89							D1UE3	3686.18		D1SI1	1998.55
D1UI1		0.915	50	50.9999	2549.99	2.66667	6799.99									D1UI1	6799.99		D1SI2	215.833
D1UI2		0.585	50	31.3901	1569.5	2.66667	4185.34									D1UI2	4185.34		D1SI3	1269.61
D1UI3		0.906	50	50.4651	2523.25	2.66667	6728.68	5904.67	1216.1							D1UI3	6728.68		D2SI1	778.378
D2SE1		0.438	50	22.6548	1132.74	2.66667	3020.63									D2SE1	3020.63		D2SI2	6411.75
D2SE2		0.706	50	38.5803	1929.02	2.66667	5144.04									D2SE2	5144.04		D2SI3	5468.89
D2SE3		0.572	50	30.6175	1530.88	2.66667	4082.34	4082.34	866.878							D2SE3	4082.34		D3SI1	202.713
D2SI1		0.155	50	5.83784	291.892	2.66667	778.378									D2SI1	778.378		D3SI2	2188.7
D2SI2		0.866	50	48.0881	2404.41	2.66667	6411.75									D2SI2	6411.75		D3SI3	312.686	2311.36	770.453	0.770453
D2SI3		0.747	50	41.0167	2050.84	2.66667	5468.89	4219.67	2463.62							D2SI3	5468.89		D1UE1	8321.24
D2UE1		0.736	50	40.363	2018.15	2.66667	5381.74									D2UE1	5381.74		D1UE2	8091.46
D2UE2		0.921	50	51.3564	2567.82	2.66667	6847.53									D2UE2	6847.53		D1UE3	3686.18
D2UE3		0.761	50	41.8486	2092.43	2.66667	5579.82	5936.36	649.345							D2UE3	5579.82		D2UE1	5381.74
D2UI1		1.184	50	66.9849	3349.24	2.66667	8931.32									D2UI1	8931.32		D2UE2	6847.53
D2UI3		0.977	50	54.6842	2734.21	2.66667	7291.22	8111.27	820.048							D2UI3	7291.22		D2UE3	5579.82
D3SE2		0.887	50	49.336	2466.8	2.66667	6578.14									D3SE2	6578.14		D3UE1	6031.44
D3SE3		0.277	50	13.0875	654.377	2.66667	1745	4161.57	2416.57							D3SE3	1745		D3UE2	8376.7
D3SI1		1.336	1	76.0173	76.0173	2.66667	202.713									D3SI1	202.713		D3UE3	5635.28	1598.48	532.826	0.532826
D3SI2		0.333	50	16.4153	820.763	2.66667	2188.7									D3SI2	2188.7		D1UI1	6799.99
D3SI3		2.03	1	117.257	117.257	2.66667	312.686	901.367	911.39							D3SI3	312.686		D1UI2	4185.34
D3UE1		0.818	50	45.2358	2261.79	2.66667	6031.44									D3UE1	6031.44		D1UI3	6728.68
D3UE2		1.114	50	62.8252	3141.26	2.66667	8376.7									D3UE2	8376.7		D2UI1	8931.32
D3UE3		0.768	50	42.2646	2113.23	2.66667	5635.28	6681.14	1209.8							D3UE3	5635.28		D2UI3	7291.22
D3UI1		0.818	50	45.2358	2261.79	2.66667	6031.44									D3UI1	6031.44		D3UI1	6031.44
D3UI2		0.781	50	43.0371	2151.86	2.66667	5738.28									D3UI2	5738.28		D3UI2	5738.28
D3UI3		0.823	50	45.5329	2276.65	2.66667	6071.06	5946.93	148.417							D3UI3	6071.06		D3UI3	6071.06	1363.55	482.087	0.482087
D4UE1		0.864	50	47.9693	2398.46	2.66667	6395.9
D4UE1 Surface		0.006	50	-3.01631	-150.815	2.66667	-402.174
D4UE2		0.942	50	52.6043	2630.22	2.66667	7013.91
D4UE3		1.07	50	60.2106	3010.53	2.66667	8028.08	7145.96	672.842
D4UI2		0.805	50	44.4633	2223.16	2.66667	5928.44	5928.44
D1SE3		0.625	50	33.767	1688.35	2.25	3798.79	1420.78	1692.66
D1SI3		0.217	50	9.52211	476.105	2.66667	1269.61	1161.33	731.806
D1UE3		0.522	50	27.6464	1382.32	2.66667	3686.18	6699.63	2132.89
D1UI3		0.906	50	50.4651	2523.25	2.66667	6728.68	5904.67	1216.1
D2SE3		0.572	50	30.6175	1530.88	2.66667	4082.34	4082.34	866.878
D2SI3		0.747	50	41.0167	2050.84	2.66667	5468.89	4219.67	2463.62
D2UE3		0.761	50	41.8486	2092.43	2.66667	5579.82	5936.36	649.345
D2UI3		0.977	50	54.6842	2734.21	2.66667	7291.22	8111.27	820.048
D3SE3		0.277	50	13.0875	654.377	2.66667	1745	4161.57	2416.57
D3SI3		2.03	1	117.257	117.257	2.66667	312.686	901.367	911.39
D3UE3		0.768	50	42.2646	2113.23	2.66667	5635.28	6681.14	1209.8
D3UI3		0.823	50	45.5329	2276.65	2.66667	6071.06	5946.93	148.417
D4UE3		1.07	50	60.2106	3010.53	2.66667	8028.08	7145.96	672.842
D4UI2		0.805	50	44.4633	2223.16	2.66667	5928.44	5928.44

## Sheet: Final_Sulfide
							Average of 3 measurements	Std Dev P		Average of Averages (mM)
D2UI3	0.977	50	54.6842	2734.21	2.66667	7291.22	8.11127	820.048		#REF!
D4UE3	1.07	50	60.2106	3010.53	2.66667	8028.08	7.14596	672.842
D1UE3	0.522	50	27.6464	1382.32	2.66667	3686.18	6.69963	2132.89
D3UE3	0.768	50	42.2646	2113.23	2.66667	5635.28	6.68114	1209.8
D3UI3	0.823	50	45.5329	2276.65	2.66667	6071.06	5.94693	148.417
D2UE3	0.761	50	41.8486	2092.43	2.66667	5579.82	5.93636	649.345
D4UI2	0.805	50	44.4633	2223.16	2.66667	5928.44	5.92844
D1UI3	0.906	50	50.4651	2523.25	2.66667	6728.68	5.90467	1216.1
D2SI3	0.747	50	41.0167	2050.84	2.66667	5468.89	4.21967	2463.62
D3SE3	0.277	50	13.0875	654.377	2.66667	1745	4.16157	2416.57
D2SE3	0.572	50	30.6175	1530.88	2.66667	4082.34	4.08234	866.878
D1SE3	0.625	50	33.767	1688.35	2.25	3798.79	1.42078	1692.66
D1SI3	0.217	50	9.52211	476.105	2.66667	1269.61	1.16133	731.806
D3SI3	2.03	1	117.257	117.257	2.66667	312.686	0.901367	911.39
							Average of 3 measurements	Std Dev P		Average of Averages (mM)	Std Error (mM)
D2UI3	0.977	50	54.6842	2734.21	2.66667	7291.22	8.11127	820.048		3.22156	0.772817
D1SE3	0.625	50	33.767	1688.35	2.25	3798.79	1.42078	1692.66		2.09412	0.770453
D1SI3	0.217	50	9.52211	476.105	2.66667	1269.61	1.16133	731.806		6.43904	0.532826
D1UE3	0.522	50	27.6464	1382.32	2.66667	3686.18	6.69963	2132.89		6.65429	0.482087
D1UI3	0.906	50	50.4651	2523.25	2.66667	6728.68	5.90467	1216.1
D2SE3	0.572	50	30.6175	1530.88	2.66667	4082.34	4.08234	866.878
D2SI3	0.747	50	41.0167	2050.84	2.66667	5468.89	4.21967	2463.62
D2UE3	0.761	50	41.8486	2092.43	2.66667	5579.82	5.93636	649.345
D3SE3	0.277	50	13.0875	654.377	2.66667	1745	4.16157	2416.57
D3SI3	2.03	1	117.257	117.257	2.66667	312.686	0.901367	911.39
D3UE3	0.768	50	42.2646	2113.23	2.66667	5635.28	6.68114	1209.8
D3UI3	0.823	50	45.5329	2276.65	2.66667	6071.06	5.94693	148.417
D4UE3	1.07	50	60.2106	3010.53	2.66667	8028.08	7.14596	672.842
D4UI2	0.805	50	44.4633	2223.16	2.66667	5928.44	5.92844
D1SE1	-5.82499
D1SE2	469.375
D1SE3	3798.79
D2SE1	3020.63
D2SE2	5144.04
D2SE3	4082.34
D3SE2	6578.14
D3SE3	1745
D1SI1	1998.55
D1SI2	215.833
D1SI3	1269.61
D2SI1	778.378
D2SI2	6411.75
D2SI3	5468.89
D3SI1	202.713
D3SI2	2188.7
D3SI3	312.686
D1UE1	8321.24
D1UE2	8091.46
D1UE3	3686.18
D2UE1	5381.74
D2UE2	6847.53
D2UE3	5579.82
D3UE1	6031.44
D3UE2	8376.7
D3UE3	5635.28
D1UI1	6799.99
D1UI2	4185.34
D1UI3	6728.68
D2UI1	8931.32
D2UI3	7291.22
D3UI1	6031.44
D3UI2	5738.28
D3UI3	6071.06

## Sheet: Shear Strength Measurements
DAY 1	Site + Measurement		Conversion factor for blades used --> (.0625) * 10
depth(cm)	D1SE1	D1SE1	D1SI1		D1SE2		D1SI2		D1SE3		D1SI3		D1UE1		D1UI1		D1UE2		D1UI2		D1UE3		D1UI3
10	6.5	5.1	7	9.5	4.1	4	4	3	4	2	6	3	3.4	4.6	2	3	5.5	1.9	1.4	4.2	2	2.6	4.6	2.4
25	1.6	3	2	1.5	4.3	4.5	3.5	1	1.5	1	2	1.4	5	3.2	1.2	1.5	1	1.4	0.4	3.8	0.4	0.7	1.8	0.2
35	3	2	1.5	2.5	0.8	1.6	2.5	1.5	2	1	2.5	2	4	3	2	2.2	1	2.4	0.4	3.9	0.8	0.8	2	0.2
55	0.4	2.8	0.5	2	3	2.5	1	1	0.2	3.5	1	2	2.5	1.4	2.8	2.4	2	3	1	2.5	3.2	2	1	1.4
depth(cm)	Average											Sums
10	5.8		8.25		4.05		3.5		3		4.5	29.1	4		2.5		3.7		2.8		2.3		3.5	18.8
25	2.3		1.75		4.4		2.25		1.25		1.7	13.65	4.1		1.35		1.2		2.1		0.55		1	10.3
35	2.5		2		1.2		2		1.5		2.25	11.45	3.5		2.1		1.7		2.15		0.8		1.1	11.35
55	1.6		1.25		2.75		1		1.85		1.5	9.95	1.95		2.6		2.5		1.75		2.6		1.2	12.6
	D1SE1	D1SE2	D1SE3	D1UE1	D1UE2	D1UE3	D1SE AVG	D1UE AVG
10	5.8	4.05	3	4	3.7	2.3	2.67708	2.08333
25	2.3	4.4	1.25	4.1	1.2	0.55	1.65625	1.21875
35	2.5	1.2	1.5	3.5	1.7	0.8	1.08333	1.25
55	1.6	2.75	1.85	1.95	2.5	2.6	1.29167	1.46875
DAY 2	D2SE1		D2SI1		D2SE2		D2SI2		D2SE3		D2SI3		D2UE1		D2UI1		D2UE2		D2UI2
10	3.1	3.2	1.2	2.2	0.2	0.2	5.1	2.4	3.4	5	0.8	1	0.5	0.6	0.5	1	4.8	3.8	5.1	2.4
25	2.1	1.4	1.8	0.5	0.8	0.2	2.5	0.8	1.9	4.3	2	2	1.1	0.8	1.3	0.8	0.6	0.5	2.5	0.8
35	0.3	0.8	0.2	0.2	2.2	1.2	1	0.7	0.2	0.3	0.4	0.8	1.1	1.1	1.3	1	0.6	1	1	0.7
55	2.3	2.1	2.8	0.6	3.5	0.4	3.1	1.2	0.8	0.2	2.2	0.5	0.8	1	0.4	0.9	2.2	3.2	3.1	1.2
	Average
10	3.15		1.7		0.2		3.75		4.2		0.9	13.9	0.55		0.75		4.3		3.75		14.025
25	1.75		1.15		0.5		1.65		3.1		2	10.15	0.95		1.05		0.55		1.65		6.3
35	0.55		0.2		1.7		0.85		0.25		0.6	4.15	1.1		1.15		0.8		0.85		5.85
55	2.2		1.7		1.95		2.15		0.5		1.35	9.85	0.9		0.65		2.7		2.15		9.6
	D2SE1	D2SE2	D2SE3	D2UE1	D2UE2	D2UE3	D2SE AVG	D2UEAVG
10	3.15	0.2	4.2	0.55	4.3		1.57292	1.51562
25	1.75	0.5	3.1	0.95	0.55		1.11458	0.46875
35	0.55	1.7	0.25	1.1	0.8		0.520833	0.59375
55	2.2	1.95	0.5	0.9	2.7		0.96875	1.125
DAY 3	D3SE1		D3SI1		D2SE2		D3SI2		D3SE3		D3SI3		D3UE1		D3UI1		D3UE2		D3UI2		D3UE3		D3UI3
10	8.7	4	5.2	3.3	9.3	4.7	3	4.8	4	4.8	2.4	2.8	0.8	1.2	3.6	0.8	0.7	1.2	0.2	0.2	1.1	1	1.6	2
25	2.5	0.5	3.9	1.6	2.5	0.8	1	1.8	0.2	0.4	1.2	0.8	1.1	0.8	1	0.7	0.5	0.7	1	1.6	0.3	0.6	1	1
35	1.4	0.2	6	2.2	1.2	0.6	1	1.4	1.2	1.2	0.5	0.8	0.4	0.6	0.4	0.8	1.1	0.8	0.8	0.8	0.2	1	1.1	1.8
55	1.6	2.2	2.9	2.9	1	0.7	0.6	1	2.2	1	0.8	0.8	0.8	1	1	1	1	1.5	0.6	1	1.2	0.4	1.8	1.8
												Sums
10	6.35		4.25		7		3.9		4.4		2.6	28.5	1		2.2		0.95		0.2		1.05		1.8	7.2
25	1.5		2.75		1.65		1.4		0.3		1	8.6	0.95		0.85		0.6		1.3		0.45		1	5.15
35	0.8		4.1		0.9		1.2		1.2		0.65	8.85	0.5		0.6		0.95		0.8		0.6		1.45	4.9
55	1.9		2.9		0.85		0.8		1.6		0.8	8.85	0.9		1		1.25		0.8		0.8		1.8	6.55
	D3SE1	D3SE2	D3SE3	D3UE1	D3UE2	D3UE3	D3SE AVG	D3UE AVG
10	6.35	7	4.4	1	0.95	1.05	3.69792	0.625
25	1.5	1.65	0.3	0.95	0.6	0.45	0.71875	0.416667
35	0.8	0.9	1.2	0.5	0.95	0.6	0.604167	0.427083
55	1.9	0.85	1.6	0.9	1.25	0.8	0.90625	0.614583
EDGE Shear Strength Averages									Interior Shear Strength Averages
Depth (cm)	D1SE AVG	D1UE AVG	D2SE AVG	D2UEAVG	D3SE AVG	D3UE AVG			Depth (cm)	D1SI AVG	D1UI AVG	D2SI AVG	D2UI AVG	D3SI AVG	D3UI AVG
10	2.67708	2.08333	1.57292	1.51562	3.69792	0.625			10	3.38542	1.83333	1.32292	1.40625	2.23958	0.875
25	1.65625	1.21875	1.11458	0.46875	0.71875	0.416667			25	1.1875	0.927083	1	0.84375	1.07292	0.65625
35	1.08333	1.25	0.520833	0.59375	0.604167	0.427083			35	1.30208	1.11458	0.34375	0.625	1.23958	0.59375
55	1.29167	1.46875	0.96875	1.125	0.90625	0.614583			55	0.78125	1.15625	1.08333	0.875	0.9375	0.75
Depth (cm)	Stable Edge Avg	Unstable Edge Average	Stable Interior	Unstable Interior
10	2.64931	1.40799	2.31597	1.37153
Standard errors
	SE Standard Error	UE Standard Error	SI Standard Error	UI Standard Error
10	0.427045	0.343848	0.434371	0.27452

## Sheet: Shear Strength Measurements RAW
DAY 1	Site + Measurement		Multiply values by 10 for true kPa				see device manual here: https://www.manualsdir.com/manuals/600977/humboldt-h-4227-vane-inspection-kit.html?page=2
depth(cm)	D1SE1	D1SE1	D1SI1		D1SE2		D1SI2		D1SE3		D1SI3		D1UE1		D1UI1		D1UE2		D1UI2		D1UE3		D1UI3
10	6.5	5.1	7	9.5	4.1	4	4	3	4	2	6	3	3.4	4.6	2	3	5.5	1.9	1.4	4.2	2	2.6	4.6	2.4
25	1.6	3	2	1.5	4.3	4.5	3.5	1	1.5	1	2	1.4	5	3.2	1.2	1.5	1	1.4	0.4	3.8	0.4	0.7	1.8	0.2
35	3	2	1.5	2.5	0.8	1.6	2.5	1.5	2	1	2.5	2	4	3	2	2.2	1	2.4	0.4	3.9	0.8	0.8	2	0.2
55	0.4	2.8	0.5	2	3	2.5	1	1	0.2	3.5	1	2	2.5	1.4	2.8	2.4	2	3	1	2.5	3.2	2	1	1.4
depth(cm)	Average											Sums
10	5.8		8.25		4.05		3.5		3		4.5	29.1	4		2.5		3.7		2.8		2.3		3.5	18.8
25	2.3		1.75		4.4		2.25		1.25		1.7	13.65	4.1		1.35		1.2		2.1		0.55		1	10.3
35	2.5		2		1.2		2		1.5		2.25	11.45	3.5		2.1		1.7		2.15		0.8		1.1	11.35
55	1.6		1.25		2.75		1		1.85		1.5	9.95	1.95		2.6		2.5		1.75		2.6		1.2	12.6
DAY 2
	D2SE1		D2SI1		D2SE2		D2SI2		D2SE3		D2SI3	Sums	D2UE1		D2UI1		D2UE2		D2UI2
10	3.1	3.2	1.2	2.2	0.2	0.2	5.1	2.4	3.4	5	0.8	1	0.5	0.6	0.5	1	4.8	3.8	5.1	2.4
25	2.1	1.4	1.8	0.5	0.8	0.2	2.5	0.8	1.9	4.3	2	2	1.1	0.8	1.3	0.8	0.6	0.5	2.5	0.8
35	0.3	0.8	0.2	0.2	2.2	1.2	1	0.7	0.2	0.3	0.4	0.8	1.1	1.1	1.3	1	0.6	1	1	0.7
55	2.3	2.1	2.8	0.6	3.5	0.4	3.1	1.2	0.8	0.2	2.2	0.5	0.8	1	0.4	0.9	2.2	3.2	3.1	1.2
	Average
10	3.15		1.7		0.2		3.75		4.2		0.9		0.55		0.75		4.3		3.75
25	1.75		1.15		0.5		1.65		3.1		2		0.95		1.05		0.55		1.65
35	0.55		0.2		1.7		0.85		0.25		0.6		1.1		1.15		0.8		0.85
55	2.2		1.7		1.95		2.15		0.5		1.35		0.9		0.65		2.7		2.15
DAY 3
	D3SE1		D3SI1		D2SE2		D3SI2		D3SE3		D3SI3		D3UE1		D3UI1		D3UE2		D3UI2		D3UE3		D3UI3
10	8.7	4	5.2	3.3	9.3	4.7	3	4.8	4	4.8	2.4	2.8	0.8	1.2	3.6	0.8	0.7	1.2	0.2	0.2	1.1	1	1.6	2
25	2.5	0.5	3.9	1.6	2.5	0.8	1	1.8	0.2	0.4	1.2	0.8	1.1	0.8	1	0.7	0.5	0.7	1	1.6	0.3	0.6	1	1
35	1.4	0.2	6	2.2	1.2	0.6	1	1.4	1.2	1.2	0.5	0.8	0.4	0.6	0.4	0.8	1.1	0.8	0.8	0.8	0.2	1	1.1	1.8
55	1.6	2.2	2.9	2.9	1	0.7	0.6	1	2.2	1	0.8	0.8	0.8	1	1	1	1	1.5	0.6	1	1.2	0.4	1.8	1.8
10	6.35		4.25		7		3.9		4.4		2.6		1		2.2		0.95		0.2		1.05		1.8
25	1.5		2.75		1.65		1.4		0.3		1		0.95		0.85		0.6		1.3		0.45		1
35	0.8		4.1		0.9		1.2		1.2		0.65		0.5		0.6		0.95		0.8		0.6		1.45
55	1.9		2.9		0.85		0.8		1.6		0.8		0.9		1		1.25		0.8		0.8		1.8

## Sheet: Shear Strength Uncorrected
DAY 1	Site + Measurement		Correction Factor -->		0.0625	16
depth(cm)	D1SE1	D1SE1	D1SI1		D1SE2		D1SI2		D1SE3		D1SI3		D1UE1		D1UI1		D1UE2		D1UI2		D1UE3		D1UI3
10	0.40625	0.31875	0.4375	0.59375	0.25625	0.25	0.25	0.1875	0.25	0.125	0.375	0.1875	0.2125	0.2875	0.125	0.1875	0.34375	0.11875	0.0875	0.2625	0.125	0.1625	0.2875	0.15
25	0.1	0.1875	0.125	0.09375	0.26875	0.28125	0.21875	0.0625	0.09375	0.0625	0.125	0.0875	0.3125	0.2	0.075	0.09375	0.0625	0.0875	0.025	0.2375	0.025	0.04375	0.1125	0.0125
35	0.1875	0.125	0.09375	0.15625	0.05	0.1	0.15625	0.09375	0.125	0.0625	0.15625	0.125	0.25	0.1875	0.125	0.1375	0.0625	0.15	0.025	0.24375	0.05	0.05	0.125	0.0125
55	0.025	0.175	0.03125	0.125	0.1875	0.15625	0.0625	0.0625	0.0125	0.21875	0.0625	0.125	0.15625	0.0875	0.175	0.15	0.125	0.1875	0.0625	0.15625	0.2	0.125	0.0625	0.0875
0	0	0	0	0	0	0	0	0	0	0	0	0	0	0	0	0	0	0	0	0	0	0	0	0
depth(cm)	Average	0	0	0	0	0	0	0	0	0	0	Sums	0	0	0	0	0	0	0	0	0	0	0	0
10	0.3625	0	0.515625	0	0.253125	0	0.21875	0	0.1875	0	0.28125	1.81875	0.25	0	0.15625	0	0.23125	0	0.175	0	0.14375	0	0.21875	1.175
25	0.14375	0	0.109375	0	0.275	0	0.140625	0	0.078125	0	0.10625	0.853125	0.25625	0	0.084375	0	0.075	0	0.13125	0	0.034375	0	0.0625	0.64375
35	0.15625	0	0.125	0	0.075	0	0.125	0	0.09375	0	0.140625	0.715625	0.21875	0	0.13125	0	0.10625	0	0.134375	0	0.05	0	0.06875	0.709375
55	0.1	0	0.078125	0	0.171875	0	0.0625	0	0.115625	0	0.09375	0.621875	0.121875	0	0.1625	0	0.15625	0	0.109375	0	0.1625	0	0.075	0.7875
0	D1SE1	D1SE2	D1SE3	D1UE1	D1UE2	D1UE3	D1SE AVG	D1UE AVG		D1SI1	D1SI2	D1SI3	D1UI1	D1UI2	D1UI3	D1SI AVG	D1UI AVG
10	0.3625	0.253125	0.1875	0.25	0.23125	0.14375	0.267708	0.208333		0.515625	0.21875	0.28125	0.15625	0.175	0.21875	0.338542	0.183333
25	0.14375	0.275	0.078125	0.25625	0.075	0.034375	0.165625	0.121875		0.109375	0.140625	0.10625	0.084375	0.13125	0.0625	0.11875	0.0927083
35	0.15625	0.075	0.09375	0.21875	0.10625	0.05	0.108333	0.125		0.125	0.125	0.140625	0.13125	0.134375	0.06875	0.130208	0.111458
55	0.1	0.171875	0.115625	0.121875	0.15625	0.1625	0.129167	0.146875		0.078125	0.0625	0.09375	0.1625	0.109375	0.075	0.078125	0.115625
0	0	0	0	0	0	0	0	0
DAY 2	D2SE1	0	D2SI1	0	D2SE2	0	D2SI2	0	D2SE3	0	D2SI3	0	D2UE1	0	D2UI1	0	D2UE2	0	D2UI2	0	0	0	0	0
10	0.19375	0.2	0.075	0.1375	0.0125	0.0125	0.31875	0.15	0.2125	0.3125	0.05	0.0625	0.03125	0.0375	0.03125	0.0625	0.3	0.2375	0.31875	0.15	0	0	0	0
25	0.13125	0.0875	0.1125	0.03125	0.05	0.0125	0.15625	0.05	0.11875	0.26875	0.125	0.125	0.06875	0.05	0.08125	0.05	0.0375	0.03125	0.15625	0.05	0	0	0	0
35	0.01875	0.05	0.0125	0.0125	0.1375	0.075	0.0625	0.04375	0.0125	0.01875	0.025	0.05	0.06875	0.06875	0.08125	0.0625	0.0375	0.0625	0.0625	0.04375	0	0	0	0
55	0.14375	0.13125	0.175	0.0375	0.21875	0.025	0.19375	0.075	0.05	0.0125	0.1375	0.03125	0.05	0.0625	0.025	0.05625	0.1375	0.2	0.19375	0.075	0	0	0	0
0	0	0	0	0	0	0	0	0	0	0	0	0	0	0	0	0	0	0	0	0	0	0	0	0
0	Average	0	0	0	0	0	0	0	0	0	0	0	0	0	0	0	0	0	0	0	0	0	0	0
10	0.196875	0	0.10625	0	0.0125	0	0.234375	0	0.2625	0	0.05625	0.86875	0.034375	0	0.046875	0	0.26875	0	0.234375	0	0.876562	0	0	0
25	0.109375	0	0.071875	0	0.03125	0	0.103125	0	0.19375	0	0.125	0.634375	0.059375	0	0.065625	0	0.034375	0	0.103125	0	0.39375	0	0	0
35	0.034375	0	0.0125	0	0.10625	0	0.053125	0	0.015625	0	0.0375	0.259375	0.06875	0	0.071875	0	0.05	0	0.053125	0	0.365625	0	0	0
55	0.1375	0	0.10625	0	0.121875	0	0.134375	0	0.03125	0	0.084375	0.615625	0.05625	0	0.040625	0	0.16875	0	0.134375	0	0.6	0	0	0
0	0	0	0	0	0	0	0	0	0	0	0	0	0	0	0	0	0	0	0	0	0	0	0	0
0	D2SE1	D2SE2	D2SE3	D2UE1	D2UE2	D2UE3	D2SE AVG	D2UEAVG		D2SI1	D2SI2	D2SI3	D2UI1	D2UI2	D2UI3	D2SI AVG	D2UI AVG
10	0.196875	0.0125	0.2625	0.034375	0.26875	0	0.157292	0.151562		0.10625	0.234375	0.05625	0.046875	0.234375		0.132292	0.140625
25	0.109375	0.03125	0.19375	0.059375	0.034375	0	0.111458	0.046875		0.071875	0.103125	0.125	0.065625	0.103125		0.1	0.084375
35	0.034375	0.10625	0.015625	0.06875	0.05	0	0.0520833	0.059375		0.0125	0.053125	0.0375	0.071875	0.053125		0.034375	0.0625
55	0.1375	0.121875	0.03125	0.05625	0.16875	0	0.096875	0.1125		0.10625	0.134375	0.084375	0.040625	0.134375		0.108333	0.0875
0	0	0	0	0	0	0	0	0
DAY 3	D3SE1	0	D3SI1	0	D2SE2	0	D3SI2	0	D3SE3	0	D3SI3	0	D3UE1	0	D3UI1	0	D3UE2	0	D3UI2	0	D3UE3	0	D3UI3	0
10	0.54375	0.25	0.325	0.20625	0.58125	0.29375	0.1875	0.3	0.25	0.3	0.15	0.175	0.05	0.075	0.225	0.05	0.04375	0.075	0.0125	0.0125	0.06875	0.0625	0.1	0.125
25	0.15625	0.03125	0.24375	0.1	0.15625	0.05	0.0625	0.1125	0.0125	0.025	0.075	0.05	0.06875	0.05	0.0625	0.04375	0.03125	0.04375	0.0625	0.1	0.01875	0.0375	0.0625	0.0625
35	0.0875	0.0125	0.375	0.1375	0.075	0.0375	0.0625	0.0875	0.075	0.075	0.03125	0.05	0.025	0.0375	0.025	0.05	0.06875	0.05	0.05	0.05	0.0125	0.0625	0.06875	0.1125
55	0.1	0.1375	0.18125	0.18125	0.0625	0.04375	0.0375	0.0625	0.1375	0.0625	0.05	0.05	0.05	0.0625	0.0625	0.0625	0.0625	0.09375	0.0375	0.0625	0.075	0.025	0.1125	0.1125
0	0	0	0	0	0	0	0	0	0	0	0	0	0	0	0	0	0	0	0	0	0	0	0	0
0	0	0	0	0	0	0	0	0	0	0	0	Sums	0	0	0	0	0	0	0	0	0	0	0	0
10	0.396875	0	0.265625	0	0.4375	0	0.24375	0	0.275	0	0.1625	1.78125	0.0625	0	0.1375	0	0.059375	0	0.0125	0	0.065625	0	0.1125	0.45
25	0.09375	0	0.171875	0	0.103125	0	0.0875	0	0.01875	0	0.0625	0.5375	0.059375	0	0.053125	0	0.0375	0	0.08125	0	0.028125	0	0.0625	0.321875
35	0.05	0	0.25625	0	0.05625	0	0.075	0	0.075	0	0.040625	0.553125	0.03125	0	0.0375	0	0.059375	0	0.05	0	0.0375	0	0.090625	0.30625
55	0.11875	0	0.18125	0	0.053125	0	0.05	0	0.1	0	0.05	0.553125	0.05625	0	0.0625	0	0.078125	0	0.05	0	0.05	0	0.1125	0.409375
0	0	0	0	0	0	0	0	0
0	D3SE1	D3SE2	D3SE3	D3UE1	D3UE2	D3UE3	D3SE AVG	D3UE AVG		D3SI1	D3SI2	D3SI3	D3UI1	D3UI2	D3UI3	D3SI AVG	D3UI AVG
10	0.396875	0.4375	0.275	0.0625	0.059375	0.065625	0.369792	0.0625		0.265625	0.24375	0.1625	0.1375	0.0125	0.1125	0.223958	0.0875
25	0.09375	0.103125	0.01875	0.059375	0.0375	0.028125	0.071875	0.0416667		0.171875	0.0875	0.0625	0.053125	0.08125	0.0625	0.107292	0.065625
35	0.05	0.05625	0.075	0.03125	0.059375	0.0375	0.0604167	0.0427083		0.25625	0.075	0.040625	0.0375	0.05	0.090625	0.123958	0.059375
55	0.11875	0.053125	0.1	0.05625	0.078125	0.05	0.090625	0.0614583		0.18125	0.05	0.05	0.0625	0.05	0.1125	0.09375	0.075
Standard Error calculations									EDGE Shear Strength Averages									Interior Shear Strength Averages
	D1SE	D1UE	D2SE	D2UE	D3SE	D3UE			Depth (cm)	D1SE AVG	D1UE AVG	D2SE AVG	D2UEAVG	D3SE AVG	D3UE AVG			Depth (cm)	D1SI AVG	D1UI AVG	D2SI AVG	D2UI AVG	D3SI AVG	D3UI AVG
10	0.0510417	0.0327422	0.0748334	0.117187	0.0488252	0.00180422			10	0.267708	0.208333	0.157292	0.151562	0.369792	0.0625			10	0.338542	0.183333	0.132292	0.140625	0.223958	0.0875
25	0.0578758	0.0682033	0.0469213	0.0125	0.0267	0.00925854			25	0.165625	0.121875	0.111458	0.046875	0.071875	0.0416667			25	0.11875	0.0927083	0.1	0.084375	0.107292	0.065625
35	0.0245621	0.0496078	0.0276189	0.009375	0.00751157	0.00852641			35	0.108333	0.125	0.0520833	0.059375	0.0604167	0.0427083			35	0.130208	0.111458	0.034375	0.0625	0.123958	0.059375
55	0.0218253	0.0126295	0.0331211	0.05625	0.0195156	0.00852641			55	0.129167	0.146875	0.096875	0.1125	0.090625	0.0614583			55	0.078125	0.115625	0.108333	0.0875	0.09375	0.075
Interior Standard Error calculations
	D1SI	D1UI	D2SI	D2UI	D3SI	D3UI			Depth (cm)	Stable Edge Avg	Unstable Edge Average	Stable Interior	Unstable Interior					Depth (cm)	Stable Interior Total Avg	Unstable Interior Avg
10	0.0903612	0.0185171	0.0530432	0.09375	0.0313713	0.0381881			10	2.64931	1.40799	2.31597	1.37153					10	0.231597	0.137153
25	0.0109746	0.0202791	0.0154153	0.01875	0.0330883	0.00826797			Standard error	0.427045	0.343848	0.434371	0.27452
35	0.00520833	0.0213732	0.0118311	0.009375	0.066886	0.0160363
55	0.0090211	0.0254516	0.0144713	0.046875	0.04375	0.0190941
Standard errors
	SE Standard Error	UE Standard Error	SI Standard Error	UI Standard Error
10	0.0427045	0.0343848	0.0434371	0.027452
	0.427045	0.343848	0.434371	0.27452
T test (error)	0.0398596
	Array 1	Array 2
	0.3625	0.25
	0.253125	0.23125
	0.1875	0.14375
	0.196875	0.034375
	0.0125	0.26875
	0.2625
	0.396875	0.0625
	0.4375	0.059375
	0.275	0.065625
